# Supplementary material for: Epistasis analysis of microRNAs on pathological stages in colon cancer based on an Empirical Bayesian Elastic Net method
Source: PubMed Central journal article supplement (PMC5657052; doi:10.1186/s12864-017-4130-7), 2017-10-16
Supplement: 12864_2017_4130_MOESM1_ESM.pdf [file 12864_2017_4130_MOESM1_ESM.pdf]

Supplementary Table 1. Gene Ontology (GO) Enrichment Analysis Results.

| GO biological process complete                                      | Homo sapiens - REFLIST<br>(20814) | upload_1<br>(22) | upload_1<br>(expected) | upload_1<br>(fold Enrichment) | upload_1<br>(P-value) | -log<br>(p-value) |
|---------------------------------------------------------------------|-----------------------------------|------------------|------------------------|-------------------------------|-----------------------|-------------------|
| regulation of cell proliferation (GO:0042127)                       | 1501                              | 15               | 1.59                   | 9.45                          | 6.40E-09              | 8.19              |
| negative regulation of cell differentiation (GO:0045596)            | 599                               | 11               | 0.63                   | 17.37                         | 4.87E-08              | 7.31              |
| positive regulation of cell proliferation (GO:0008284)              | 826                               | 12               | 0.87                   | 13.74                         | 5.61E-08              | 7.25              |
| positive regulation of cellular process (GO:0048522)                | 4728                              | 20               | 5                      | 4                             | 1.57E-07              | 6.8               |
| positive regulation of macromolecule metabolic process (GO:0010604) | 2891                              | 17               | 3.06                   | 5.56                          | 2.87E-07              | 6.54              |
| generation of neurons (GO:0048699)                                  | 1629                              | 14               | 1.72                   | 8.13                          | 4.66E-07              | 6.33              |
| cell surface receptor signaling pathway (GO:0007166)                | 2470                              | 16               | 2.61                   | 6.13                          | 4.68E-07              | 6.33              |
| negative regulation of cellular process (GO:0048523)                | 4246                              | 19               | 4.49                   | 4.23                          | 5.09E-07              | 6.29              |
| tissue morphogenesis (GO:0048729)                                   | 556                               | 10               | 0.59                   | 17.02                         | 7.35E-07              | 6.13              |
| regulation of multicellular organismal development (GO:2000026)     | 1698                              | 14               | 1.79                   | 7.8                           | 8.10E-07              | 6.09              |
| neurogenesis (GO:0022008)                                           | 1707                              | 14               | 1.8                    | 7.76                          | 8.70E-07              | 6.06              |
| negative regulation of developmental process (GO:0051093)           | 799                               | 11               | 0.84                   | 13.03                         | 1.05E-06              | 5.98              |
| morphogenesis of an epithelium (GO:0002009)                         | 419                               | 9                | 0.44                   | 20.32                         | 1.76E-06              | 5.75              |
| regulation of developmental process (GO:0050793)                    | 2236                              | 15               | 2.36                   | 6.35                          | 1.96E-06              | 5.71              |
| Biological process                                                  |                                   |                  |                        |                               |                       |                   |
| negative regulation of biological process (GO:0048519)              | 4624                              | 19               | 4.89                   | 3.89                          | 2.41E-06              | 5.62              |
| positive regulation of biological process (GO:0048518)              | 5476                              | 20               | 5.79                   | 3.46                          | 2.70E-06              | 5.57              |
| regulation of cell differentiation (GO:0045595)                     | 1492                              | 13               | 1.58                   | 8.24                          | 2.92E-06              | 5.53              |
| epithelial tube morphogenesis (GO:0060562)                          | 296                               | 8                | 0.31                   | 25.57                         | 3.69E-06              | 5.43              |
| cellular response to stimulus (GO:0051716)                          | 6613                              | 21               | 6.99                   | 3                             | 4.41E-06              | 5.36              |
| anatomical structure morphogenesis (GO:0009653)                     | 2415                              | 15               | 2.55                   | 5.88                          | 5.85E-06              | 5.23              |
| positive regulation of metabolic process (GO:0009893)               | 3595                              | 17               | 3.8                    | 4.47                          | 9.68E-06              | 5.01              |
| tube morphogenesis (GO:0035239)                                     | 335                               | 8                | 0.35                   | 22.59                         | 9.71E-06              | 5.01              |
| positive regulation of gene expression (GO:0010628)                 | 1730                              | 13               | 1.83                   | 7.11                          | 1.80E-05              | 4.74              |
| signal transduction (GO:0007165)                                    | 5174                              | 19               | 5.47                   | 3.47                          | 1.85E-05              | 4.73              |
| regulation of multicellular organismal process (GO:0051239)         | 2631                              | 15               | 2.78                   | 5.39                          | 1.96E-05              | 4.71              |
| cell development (GO:0048468)                                       | 1742                              | 13               | 1.84                   | 7.06                          | 1.96E-05              | 4.71              |
| tube development (GO:0035295)                                       | 564                               | 9                | 0.6                    | 15.1                          | 2.35E-05              | 4.63              |
| cell morphogenesis involved in differentiation (GO:0000904)         | 854                               | 10               | 0.9                    | 11.08                         | 4.58E-05              | 4.34              |
| positive regulation of developmental process (GO:0051094)           | 1150                              | 11               | 1.22                   | 9.05                          | 4.82E-05              | 4.32              |

|                                                                          |      |    |      |       |          |      |
|--------------------------------------------------------------------------|------|----|------|-------|----------|------|
| nervous system development (GO:0007399)                                  | 2355 | 14 | 2.49 | 5.62  | 6.10E-05 | 4.21 |
| cell differentiation (GO:0030154)                                        | 3423 | 16 | 3.62 | 4.42  | 6.44E-05 | 4.19 |
| single organism signaling (GO:0044700)                                   | 5561 | 19 | 5.88 | 3.23  | 6.79E-05 | 4.17 |
| signaling (GO:0023052)                                                   | 5564 | 19 | 5.88 | 3.23  | 6.86E-05 | 4.16 |
| neuron differentiation (GO:0030182)                                      | 1208 | 11 | 1.28 | 8.62  | 8.04E-05 | 4.09 |
| positive regulation of cellular metabolic process (GO:0031325)           | 2928 | 15 | 3.09 | 4.85  | 8.76E-05 | 4.06 |
| cell communication (GO:0007154)                                          | 5650 | 19 | 5.97 | 3.18  | 9.04E-05 | 4.04 |
| positive regulation of response to stimulus (GO:0048584)                 | 2027 | 13 | 2.14 | 6.07  | 1.24E-04 | 3.91 |
| nephron tubule development (GO:0072080)                                  | 75   | 5  | 0.08 | 63.07 | 1.25E-04 | 3.9  |
| epithelium development (GO:0060429)                                      | 969  | 10 | 1.02 | 9.76  | 1.52E-04 | 3.82 |
| renal tubule development (GO:0061326)                                    | 78   | 5  | 0.08 | 60.65 | 1.52E-04 | 3.82 |
| cellular developmental process (GO:0048869)                              | 3635 | 16 | 3.84 | 4.16  | 1.57E-04 | 3.8  |
| cell morphogenesis involved in neuron differentiation (GO:0048667)       | 716  | 9  | 0.76 | 11.89 | 1.84E-04 | 3.74 |
| neuron development (GO:0048666)                                          | 1024 | 10 | 1.08 | 9.24  | 2.56E-04 | 3.59 |
| response to stimulus (GO:0050896)                                        | 8117 | 21 | 8.58 | 2.45  | 2.94E-04 | 3.53 |
| regulation of response to stimulus (GO:0048583)                          | 3823 | 16 | 4.04 | 3.96  | 3.32E-04 | 3.48 |
| nephron epithelium development (GO:0072009)                              | 93   | 5  | 0.1  | 50.87 | 3.63E-04 | 3.44 |
| regulation of cell aging (GO:0090342)                                    | 33   | 4  | 0.03 | > 100 | 3.73E-04 | 3.43 |
| stem cell differentiation (GO:0048863)                                   | 196  | 6  | 0.21 | 28.96 | 3.77E-04 | 3.42 |
| positive regulation of multicellular organismal process (GO:0051240)     | 1416 | 11 | 1.5  | 7.35  | 4.15E-04 | 3.38 |
| regulation of signal transduction (GO:0009966)                           | 2740 | 14 | 2.9  | 4.83  | 4.35E-04 | 3.36 |
| positive regulation of nucleic acid-templated transcription (GO:1903508) | 1428 | 11 | 1.51 | 7.29  | 4.52E-04 | 3.34 |
| positive regulation of transcription, DNA-templated (GO:0045893)         | 1428 | 11 | 1.51 | 7.29  | 4.52E-04 | 3.34 |
| response to external stimulus (GO:0009605)                               | 2261 | 13 | 2.39 | 5.44  | 4.63E-04 | 3.33 |
| positive regulation of RNA biosynthetic process (GO:1902680)             | 1456 | 11 | 1.54 | 7.15  | 5.52E-04 | 3.26 |
| regulation of molecular function (GO:0065009)                            | 2832 | 14 | 2.99 | 4.68  | 6.65E-04 | 3.18 |
| animal organ development (GO:0048513)                                    | 2833 | 14 | 2.99 | 4.68  | 6.68E-04 | 3.18 |
| positive regulation of RNA metabolic process (GO:0051254)                | 1497 | 11 | 1.58 | 6.95  | 7.34E-04 | 3.13 |
| multicellular organism development (GO:0007275)                          | 4737 | 17 | 5.01 | 3.4   | 7.66E-04 | 3.12 |
| negative regulation of apoptotic process (GO:0043066)                    | 855  | 9  | 0.9  | 9.96  | 8.39E-04 | 3.08 |
| cell morphogenesis (GO:0000902)                                          | 1164 | 10 | 1.23 | 8.13  | 8.55E-04 | 3.07 |

---

|                                                                                      |       |    |       |       |          |      |
|--------------------------------------------------------------------------------------|-------|----|-------|-------|----------|------|
| regulation of localization (GO:0032879)                                              | 2390  | 13 | 2.53  | 5.15  | 9.00E-04 | 3.05 |
| negative regulation of programmed cell death (GO:0043069)                            | 865   | 9  | 0.91  | 9.84  | 9.26E-04 | 3.03 |
| single-multicellular organism process (GO:0044707)                                   | 5587  | 18 | 5.91  | 3.05  | 9.79E-04 | 3.01 |
| nephron development (GO:0072006)                                                     | 115   | 5  | 0.12  | 41.13 | 1.03E-03 | 2.99 |
| cell fate commitment (GO:0045165)                                                    | 235   | 6  | 0.25  | 24.16 | 1.09E-03 | 2.96 |
| system development (GO:0048731)                                                      | 4147  | 16 | 4.38  | 3.65  | 1.10E-03 | 2.96 |
| tissue development (GO:0009888)                                                      | 1562  | 11 | 1.65  | 6.66  | 1.13E-03 | 2.95 |
| columnar/cuboidal epithelial cell differentiation (GO:0002065)                       | 118   | 5  | 0.12  | 40.09 | 1.17E-03 | 2.93 |
| regulation of cell death (GO:0010941)                                                | 1574  | 11 | 1.66  | 6.61  | 1.22E-03 | 2.91 |
| multicellular organismal process (GO:0032501)                                        | 6615  | 19 | 6.99  | 2.72  | 1.51E-03 | 2.82 |
| cellular component morphogenesis (GO:0032989)                                        | 1240  | 10 | 1.31  | 7.63  | 1.54E-03 | 2.81 |
| kidney epithelium development (GO:0072073)                                           | 125   | 5  | 0.13  | 37.84 | 1.56E-03 | 2.81 |
| response to virus (GO:0009615)                                                       | 251   | 6  | 0.27  | 22.62 | 1.60E-03 | 2.8  |
| negative regulation of cell death (GO:0060548)                                       | 928   | 9  | 0.98  | 9.18  | 1.68E-03 | 2.77 |
| glomerulus development (GO:0032835)                                                  | 49    | 4  | 0.05  | 77.23 | 1.79E-03 | 2.75 |
| regulation of neurogenesis (GO:0050767)                                              | 669   | 8  | 0.71  | 11.31 | 2.00E-03 | 2.7  |
| regulation of signaling (GO:0023051)                                                 | 3089  | 14 | 3.27  | 4.29  | 2.02E-03 | 2.69 |
| branching morphogenesis of an epithelial tube (GO:0048754)                           | 132   | 5  | 0.14  | 35.84 | 2.04E-03 | 2.69 |
| axonogenesis (GO:0007409)                                                            | 672   | 8  | 0.71  | 11.26 | 2.07E-03 | 2.68 |
| positive regulation of macromolecule biosynthetic process (GO:0010557)               | 1668  | 11 | 1.76  | 6.24  | 2.21E-03 | 2.66 |
| brain development (GO:0007420)                                                       | 682   | 8  | 0.72  | 11.1  | 2.32E-03 | 2.63 |
| regulation of cell communication (GO:0010646)                                        | 3127  | 14 | 3.31  | 4.24  | 2.36E-03 | 2.63 |
| regulation of cellular process (GO:0050794)                                          | 10542 | 22 | 11.14 | 1.97  | 2.61E-03 | 2.58 |
| mesenchymal cell differentiation (GO:0048762)                                        | 139   | 5  | 0.15  | 34.03 | 2.63E-03 | 2.58 |
| negative regulation of multicellular organismal process (GO:0051241)                 | 981   | 9  | 1.04  | 8.68  | 2.69E-03 | 2.57 |
| axon development (GO:0061564)                                                        | 697   | 8  | 0.74  | 10.86 | 2.74E-03 | 2.56 |
| positive regulation of nucleobase-containing compound metabolic process (GO:0045935) | 1725  | 11 | 1.82  | 6.03  | 3.10E-03 | 2.51 |
| regulation of primary metabolic process (GO:0080090)                                 | 5997  | 18 | 6.34  | 2.84  | 3.17E-03 | 2.5  |
| regulation of macromolecule metabolic process (GO:0060255)                           | 6005  | 18 | 6.35  | 2.84  | 3.24E-03 | 2.49 |
| regulation of metabolic process (GO:0019222)                                         | 6911  | 19 | 7.3   | 2.6   | 3.26E-03 | 2.49 |
| anatomical structure development (GO:0048856)                                        | 5200  | 17 | 5.5   | 3.09  | 3.27E-03 | 2.49 |

---

|                                                                                   |       |    |       |       |          |      |
|-----------------------------------------------------------------------------------|-------|----|-------|-------|----------|------|
| positive regulation of transcription from RNA polymerase II promoter (GO:0045944) | 1010  | 9  | 1.07  | 8.43  | 3.43E-03 | 2.46 |
| head development (GO:0060322)                                                     | 720   | 8  | 0.76  | 10.51 | 3.50E-03 | 2.46 |
| leukocyte differentiation (GO:0002521)                                            | 293   | 6  | 0.31  | 19.37 | 3.95E-03 | 2.4  |
| regulation of developmental growth (GO:0048638)                                   | 293   | 6  | 0.31  | 19.37 | 3.95E-03 | 2.4  |
| regulation of cellular metabolic process (GO:0031323)                             | 6100  | 18 | 6.45  | 2.79  | 4.19E-03 | 2.38 |
| regulation of protein modification process (GO:0031399)                           | 1781  | 11 | 1.88  | 5.84  | 4.28E-03 | 2.37 |
| cell division (GO:0051301)                                                        | 496   | 7  | 0.52  | 13.35 | 4.48E-03 | 2.35 |
| neuron projection morphogenesis (GO:0048812)                                      | 745   | 8  | 0.79  | 10.16 | 4.53E-03 | 2.34 |
| positive regulation of cellular biosynthetic process (GO:0031328)                 | 1796  | 11 | 1.9   | 5.79  | 4.66E-03 | 2.33 |
| positive regulation of developmental growth (GO:0048639)                          | 157   | 5  | 0.17  | 30.13 | 4.77E-03 | 2.32 |
| negative regulation of cell development (GO:0010721)                              | 304   | 6  | 0.32  | 18.67 | 4.89E-03 | 2.31 |
| regulation of nervous system development (GO:0051960)                             | 755   | 8  | 0.8   | 10.02 | 5.00E-03 | 2.3  |
| morphogenesis of a branching epithelium (GO:0061138)                              | 160   | 5  | 0.17  | 29.57 | 5.23E-03 | 2.28 |
| positive regulation of nitrogen compound metabolic process (GO:0051173)           | 1818  | 11 | 1.92  | 5.72  | 5.26E-03 | 2.28 |
| positive regulation of biosynthetic process (GO:0009891)                          | 1827  | 11 | 1.93  | 5.7   | 5.53E-03 | 2.26 |
| hemopoiesis (GO:0030097)                                                          | 515   | 7  | 0.54  | 12.86 | 5.76E-03 | 2.24 |
| single-organism developmental process (GO:0044767)                                | 5414  | 17 | 5.72  | 2.97  | 6.08E-03 | 2.22 |
| negative regulation of ossification (GO:0030279)                                  | 67    | 4  | 0.07  | 56.48 | 6.19E-03 | 2.21 |
| neuroepithelial cell differentiation (GO:0060563)                                 | 67    | 4  | 0.07  | 56.48 | 6.19E-03 | 2.21 |
| positive regulation of signal transduction (GO:0009967)                           | 1452  | 10 | 1.53  | 6.52  | 6.65E-03 | 2.18 |
| negative regulation of cell aging (GO:0090344)                                    | 17    | 3  | 0.02  | > 100 | 6.84E-03 | 2.16 |
| morphogenesis of a branching structure (GO:0001763)                               | 171   | 5  | 0.18  | 27.66 | 7.24E-03 | 2.14 |
| negative regulation of neuron death (GO:1901215)                                  | 171   | 5  | 0.18  | 27.66 | 7.24E-03 | 2.14 |
| regulation of apoptotic process (GO:0042981)                                      | 1470  | 10 | 1.55  | 6.44  | 7.45E-03 | 2.13 |
| developmental process (GO:0032502)                                                | 5502  | 17 | 5.82  | 2.92  | 7.79E-03 | 2.11 |
| regulation of biological process (GO:0050789)                                     | 11094 | 22 | 11.73 | 1.88  | 8.03E-03 | 2.1  |
| morphogenesis of an endothelium (GO:0003159)                                      | 18    | 3  | 0.02  | > 100 | 8.12E-03 | 2.09 |
| regulation of programmed cell death (GO:0043067)                                  | 1485  | 10 | 1.57  | 6.37  | 8.18E-03 | 2.09 |
| regulation of ossification (GO:0030278)                                           | 176   | 5  | 0.19  | 26.88 | 8.33E-03 | 2.08 |
| regulation of neuron differentiation (GO:0045664)                                 | 555   | 7  | 0.59  | 11.93 | 9.47E-03 | 2.02 |
| core promoter binding (GO:0001047)                                                | 153   | 6  | 0.16  | 37.1  | 2.88E-05 | 4.54 |

|                       |                                                          |       |    |       |       |          |      |
|-----------------------|----------------------------------------------------------|-------|----|-------|-------|----------|------|
| Molecular<br>function | protein domain specific binding (GO:0019904)             | 610   | 8  | 0.64  | 12.41 | 3.26E-04 | 3.49 |
|                       | transcription factor binding (GO:0008134)                | 547   | 7  | 0.58  | 12.11 | 2.83E-03 | 2.55 |
|                       | transcription regulatory region DNA binding (GO:0044212) | 803   | 8  | 0.85  | 9.43  | 2.61E-03 | 2.58 |
|                       | regulatory region DNA binding (GO:0000975)               | 807   | 8  | 0.85  | 9.38  | 2.71E-03 | 2.57 |
|                       | regulatory region nucleic acid binding (GO:0001067)      | 808   | 8  | 0.85  | 9.37  | 2.74E-03 | 2.56 |
|                       | sequence-specific DNA binding (GO:0043565)               | 1143  | 8  | 1.21  | 6.62  | 3.57E-02 | 1.45 |
|                       | protein binding (GO:0005515)                             | 10761 | 22 | 11.37 | 1.93  | 1.35E-03 | 2.87 |

The first column denotes two categories including biological processes and molecular functions. The second column denotes the pathways and larger processes in biological processes and molecular functions (GO term). The header of the third column shows the entire background genes number, that is 20814 in GO database, and other values in the third column show the number of human genes (all genes in database) enriched in each GO term. The header of the fourth column shows that 22 target genes match the GO database and are used for the enrichment analysis, and the other number in the fourth column denotes the number of target genes enriched in each GO term. The fifth column shows the expected sizes for each GO term which is calculated according to the real number of enriched target genes for each GO term and the ratio of the number of human genes enriched in each GO term and all human genes in GO database. The sixth column shows the fold changes calculated as the ratio between the observed number of target genes in each GO term and the expected size from the fifth column. The seventh column shows the  $p$ -values calculated from the probability or chance of seeing the number of target genes out of the total genes in the list annotated to a particular GO term. The eighth column shows the  $-\log(p\text{-value})$ .
